# Supplementary material
Source: Springer Nature journal article supplement (https://www.springermedizin.de/resource/supplementary/12916_2011_499_MOESM6_ESM.pdf/9599790)

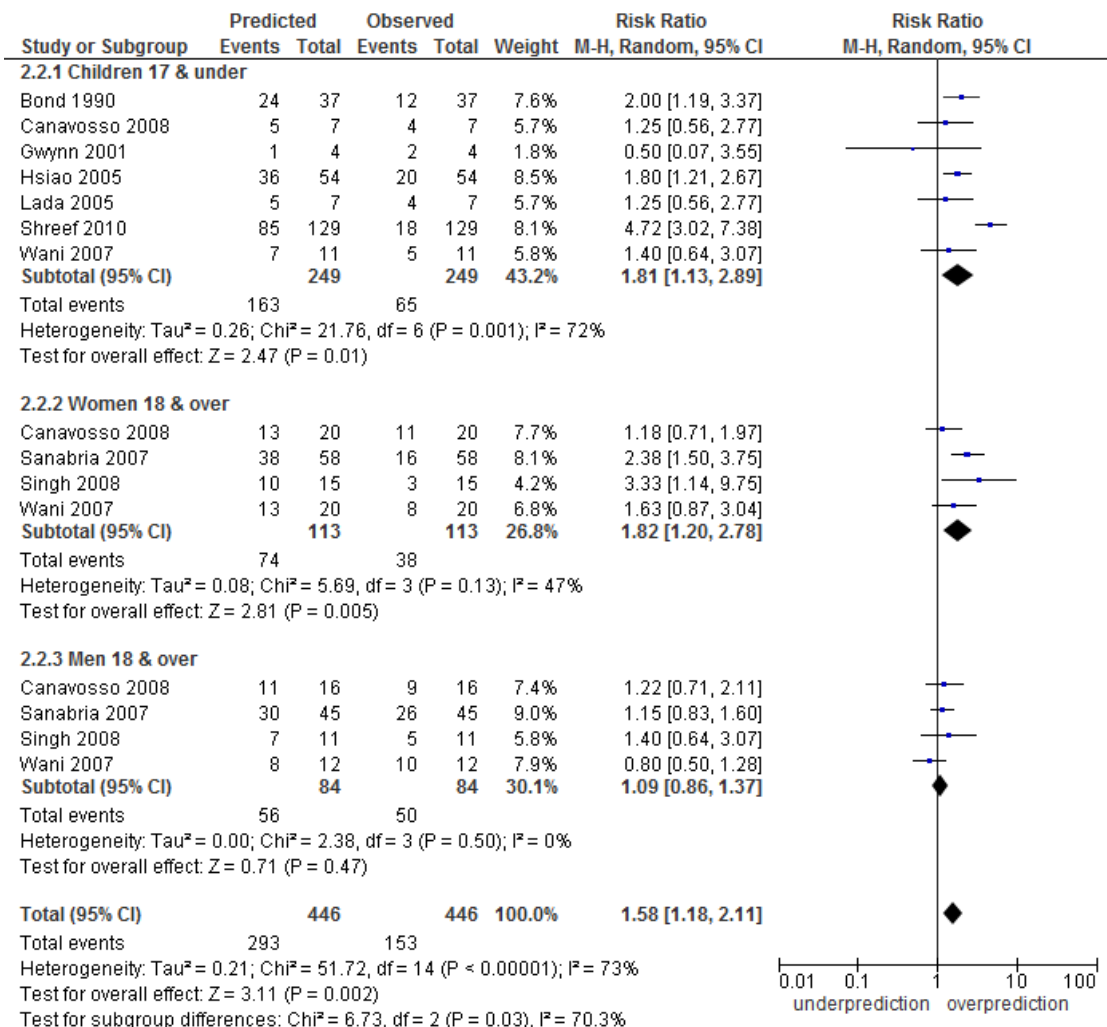

0.01 0.1 1 10 100  
underprediction overprediction

Supplement: MOESM6 [file 9599790]
